# Supplementary material for: Prevalence and risks of tuberculosis multimorbidity in low-income and middle-income countries: a meta-review
Source: PubMed Central journal article supplement (PMC9528681; doi:10.1136/bmjopen-2022-060906), 2022-09-28
Supplement: bmjopen-2022-060906supp002.pdf [file bmjopen-2022-060906supp002.pdf]

Medline (October 23<sup>rd</sup> 2020)

| # ▲ | Searches                                                                                                                                                                                                                                                                                                                    | Results |
|-----|-----------------------------------------------------------------------------------------------------------------------------------------------------------------------------------------------------------------------------------------------------------------------------------------------------------------------------|---------|
| 1   | exp Noncommunicable Diseases/ or ((Non-communicable or Noncommunicable or Non-infectious) adj (disease* or condition* or illness*)).mp.                                                                                                                                                                                     | 11685   |
| 2   | exp Chronic Disease/ or ((chronic or long-term) adj (disease* or condition* or illness*)).mp.                                                                                                                                                                                                                               | 343000  |
| 3   | exp Heart Diseases/ or (heart adj (disease* or disorder* or failure)).mp. or (cardiac adj (disease* or disorder* or failure)).mp.                                                                                                                                                                                           | 1252363 |
| 4   | exp Cardiovascular Diseases/ or (cardiovascular adj (disease* or disorder* or failure)).mp.                                                                                                                                                                                                                                 | 2482639 |
| 5   | exp Coronary Disease/ or (coronary adj (disease* or disorder* or failure)).mp.                                                                                                                                                                                                                                              | 224638  |
| 6   | exp Cerebrovascular Disorders/ or (cerebrovascular adj (disease* or disorder* or insufficienc* or occlusion*)).mp. or (vascular adj (disease* or disorder*)).mp. or (carotid* adj (disease* or disorder*)).mp.                                                                                                              | 460609  |
| 7   | exp Peripheral Arterial Disease/ or (arter* adj (disease* or disorder*)).mp.                                                                                                                                                                                                                                                | 172699  |
| 8   | exp Rheumatic Heart Disease/ or exp Heart Defects, Congenital/ or (heart adj3 (malform* or defect* or congeni*)).mp.                                                                                                                                                                                                        | 182266  |
| 9   | exp Venous Thrombosis/ or ((deep vein or deep venous) adj thrombos*).mp. or phlebothrombos*.mp.                                                                                                                                                                                                                             | 68358   |
| 10  | exp Pulmonary Embolism/ or (pulmonar* adj (thromboembolism* or embolism* or disease* or disorder*)).mp.                                                                                                                                                                                                                     | 138141  |
| 11  | exp Stroke/ or stroke.mp.                                                                                                                                                                                                                                                                                                   | 320701  |
| 12  | exp Neoplasms/ or Cancer*.mp. or neoplas*.mp. or tumor*.mp.                                                                                                                                                                                                                                                                 | 4416189 |
| 13  | exp Lung Diseases/ or exp Respiratory Tract Diseases/ or exp Lung Diseases, Obstructive/ or ((lung* or respiratory or pulmonar* or airflow or airway) adj2 (disease* or obstruct* or hypersensitiv*)).mp. or exp Asthma/ or asthma*.mp. or exp Pulmonary Disease, Chronic Obstructive/ or exp Respiratory Hypersensitivity/ | 1474479 |
| 14  | exp Diabetes Mellitus/ or diabet*.mp.                                                                                                                                                                                                                                                                                       | 710026  |
| 15  | exp Autoimmune Diseases/ or ((autoimmun* or auto immun* or autoaggress* or auto aggress*) adj (disorder* or disease*)).mp.                                                                                                                                                                                                  | 516672  |
| 16  | exp Metabolic Syndrome/ or exp Metabolic Diseases/ or ((metabolic or insulin resistance) adj (disorder* or disease* or syndrome*)).mp.                                                                                                                                                                                      | 1067250 |
| 17  | exp Obesity/ or obes*.mp.                                                                                                                                                                                                                                                                                                   | 365459  |
| 18  | exp Osteoporosis/ or osteoporo*.mp. or bone loss.mp. or exp osteolysis/ or osteolysis.mp. or bone resorption.mp.                                                                                                                                                                                                            | 153480  |

|    |                                                                                                                                                                                                                         |          |
|----|-------------------------------------------------------------------------------------------------------------------------------------------------------------------------------------------------------------------------|----------|
| 19 | exp Parkinson disease/ or parkinson*.mp. or paralysis agitans.mp.                                                                                                                                                       | 131499   |
| 20 | exp Arthritis/ or arthriti*.mp. or polyarthriti*.mp. or rheumarthriti*.mp.                                                                                                                                              | 321229   |
| 21 | exp Kidney Diseases/ or (kidney adj (disease* or disorder*)).mp.                                                                                                                                                        | 544657   |
| 22 | exp Liver Diseases/ or (liver adj (disease* or disorder* or dysfunction*)).mp.                                                                                                                                          | 591670   |
| 23 | exp Hypertension/ or high blood pressure*.mp. or hypertens*.mp.                                                                                                                                                         | 522886   |
| 24 | exp Hyperlipidemias/ or hyperlipem*.mp. or hyperlipidem*.mp. or lipem*.mp. or lipidem*.mp.                                                                                                                              | 84750    |
| 25 | exp Hypercholesterolemia/ or ((high* or elevat*) adj cholesterol*).mp. or hypercholesterem*.mp. or hypercholesterolem*.mp.                                                                                              | 50873    |
| 26 | exp Hypertriglyceridemia/ or hypertriglyceridem*.mp.                                                                                                                                                                    | 15254    |
| 27 | exp Thyroid Diseases/ or (thyroid adj (disease* or disorder*)).mp. or exp Hyperthyroidism/ or hyperthyroid*.mp. or exp Hypothyroidism/ or hypothyroid*.mp. or ((thyroid-stimulating hormone* or tsh) adj deficien*).mp. | 166497   |
| 28 | exp Motor Neuron Disease/ or motor neuron* disease*.mp. or lateral scleros*.mp. or motor system disease*.mp.                                                                                                            | 38409    |
| 29 | exp Multiple Sclerosis/ or multiple sclerosis.mp. or disseminated sclerosis.mp.                                                                                                                                         | 84720    |
| 30 | exp Emphysema/ or emphysema*.mp.                                                                                                                                                                                        | 38522    |
| 31 | exp Bronchitis/ or bronchit*.mp.                                                                                                                                                                                        | 41201    |
| 32 | 1 or 2 or 3 or 4 or 5 or 6 or 7 or 8 or 9 or 10 or 11 or 12 or 13 or 14 or 15 or 16 or 17 or 18 or 19 or 20 or 21 or 22 or 23 or 24 or 25 or 26 or 27 or 28 or 29 or 30 or 31                                           | 10292435 |
| 33 | exp Mental Disorders/ or exp Psychotic Disorders/ or ((mental* or psychiatr* or psycho*) adj (disorder* or disease* or illness*)).mp.                                                                                   | 1313460  |
| 34 | exp Depressive Disorder, Major/ or exp Depression/ or Depress*.mp. or MDD.mp.                                                                                                                                           | 552268   |
| 35 | exp Anxiety Disorders/ or exp Anxiety/ or anxi*.mp.                                                                                                                                                                     | 289411   |
| 36 | exp Phobic Disorders/ or phobi*.mp.                                                                                                                                                                                     | 17668    |
| 37 | exp Schizophrenia/ or schizophreni*.mp. or hebephreni*.mp.                                                                                                                                                              | 150158   |
| 38 | exp Somatoform Disorders/ or ((somatoform* or somati* or medically unexplained or briquet or pain) adj (disorder* or syndrome* or symptom*)).mp. or exp Medically Unexplained Symptoms/                                 | 49713    |
| 39 | exp Dissociative Disorders/ or (dissociative adj (disorder* or hysteri* or reaction*)).mp. or dissociation*.mp.                                                                                                         | 115459   |
| 40 | exp Hysteria/ or hysteri*.mp.                                                                                                                                                                                           | 6074     |
| 41 | exp Mood Disorders/ or ((affective* or mood*) adj (disorder* or disease* or illness* or symptom*)).mp.                                                                                                                  | 158894   |

|    |                                                                                                                                                                                                                               |         |
|----|-------------------------------------------------------------------------------------------------------------------------------------------------------------------------------------------------------------------------------|---------|
| 42 | exp Stress Disorders, Post-Traumatic/ or PTSD.mp. or ((post trauma* or posttrauma*) adj (stress* or neurose*)).mp. or combat disorder*.mp. or war disorder*.mp.                                                               | 48359   |
| 43 | exp Cognition Disorders/ or ((cognitive or cognition or mental or neurocognitive) adj (dysfunction* or decline* or impairment* or deterioration* or disorder* or illness* or disease*)).mp.                                   | 377493  |
| 44 | exp Personality Disorders/ or personality disorder*.mp.                                                                                                                                                                       | 48830   |
| 45 | exp "Disruptive, Impulse Control, and Conduct Disorders"/ or impulse control disorder*.mp. or intermittent explosive disorder*.mp.                                                                                            | 9781    |
| 46 | exp "Feeding and Eating Disorders"/ or ((eating or appetite or feeding) adj disorder*).mp.                                                                                                                                    | 38361   |
| 47 | exp Bipolar Disorder/ or ((bipolar or mani*) adj (disorder* or illness* or disease*)).mp.                                                                                                                                     | 51927   |
| 48 | exp Obsessive-Compulsive Disorder/ or OCD*.mp. or ((obsess*-compulsi* or obsess* or compulsi*) adj (disorder* or illness* or disease* or neuros*)).mp.                                                                        | 22060   |
| 49 | exp Panic Disorder/ or (panic adj (attack* or disorder*)).mp.                                                                                                                                                                 | 12638   |
| 50 | exp Agoraphobia/ or agoraphobi*.mp.                                                                                                                                                                                           | 4210    |
| 51 | exp Neurotic Disorders/ or neuros*.mp. or neurotic disorder*.mp. or psychoneuros*.mp.                                                                                                                                         | 190989  |
| 52 | 33 or 34 or 35 or 36 or 37 or 38 or 39 or 40 or 41 or 42 or 43 or 44 or 45 or 46 or 47 or 48 or 49 or 50 or 51                                                                                                                | 2107749 |
| 53 | exp Communicable Diseases/ or ((communic* or contag* or transmi* or infect*) adj (disease* or infection* or illness*)).mp.                                                                                                    | 212955  |
| 54 | exp Bacterial Infections/ or bacteri* infection*.mp.                                                                                                                                                                          | 916393  |
| 55 | exp Conjunctivitis/ or conjunctivitis.mp.                                                                                                                                                                                     | 24690   |
| 56 | exp HIV/ or hiv.mp. or Human immuno deficiency virus.mp.                                                                                                                                                                      | 362332  |
| 57 | exp Acquired Immunodeficiency Syndrome/ or AIDS.mp. or immunodeficiency associated virus.mp. or immun* deficiency associated virus.mp. or acquired immunodeficiency syndrome*.mp. or acquired immun* deficiency syndrome*.mp. | 226679  |
| 58 | exp Buruli Ulcer/ or Bairnsdale.mp. or Buruli.mp.                                                                                                                                                                             | 1104    |
| 59 | exp Onchocerciasis/ or onchocer*.mp.                                                                                                                                                                                          | 5978    |
| 60 | hepatitis.mp. or exp Hepatitis B/ or exp Hepatitis C/                                                                                                                                                                         | 256450  |
| 61 | exp Leishmaniasis/ or leishmania*.mp.                                                                                                                                                                                         | 37940   |
| 62 | exp Leprosy/ or lepros*.mp. or hansen*.mp.                                                                                                                                                                                    | 31193   |
| 63 | exp Elephantiasis, Filarial/ or elephantias*.mp. or filaria*.mp.                                                                                                                                                              | 14354   |
| 64 | exp Trachoma/ or egyptian ophthalmia*.mp. or trachoma*.mp.                                                                                                                                                                    | 20432   |
| 65 | exp Chikungunya Fever/ or chickungunya.mp. or chikungunya.mp.                                                                                                                                                                 | 5766    |

|    |                                                                                                                                                                                                                                   |          |
|----|-----------------------------------------------------------------------------------------------------------------------------------------------------------------------------------------------------------------------------------|----------|
| 66 | exp Taeniasis/ or taenia*.mp.                                                                                                                                                                                                     | 12366    |
| 67 | exp Cysticercosis/ or cysticercos*.mp.                                                                                                                                                                                            | 7146     |
| 68 | exp Echinococcosis/ or hydatid*.mp. or echinococc*.mp.                                                                                                                                                                            | 29913    |
| 69 | exp Chagas Disease/ or trypanosom*.mp. or chagas.mp.                                                                                                                                                                              | 44250    |
| 70 | exp Trypanosomiasis/ or sleeping sickness.mp.                                                                                                                                                                                     | 23416    |
| 71 | exp Encephalitis, Japanese/ or (japanese adj3 encephalitis).mp.                                                                                                                                                                   | 5847     |
| 72 | exp Syphilis/ or syphilis.mp.                                                                                                                                                                                                     | 37477    |
| 73 | 53 or 54 or 55 or 56 or 57 or 58 or 59 or 60 or 61 or 62 or 63 or 64 or 65 or 66 or 67 or 68 or 69 or 70 or 71 or 72                                                                                                              | 1872806  |
| 74 | exp Tuberculosis/                                                                                                                                                                                                                 | 192915   |
| 75 | Tuberculos*.mp.                                                                                                                                                                                                                   | 256334   |
| 76 | TB.mp.                                                                                                                                                                                                                            | 56951    |
| 77 | koch*.mp.                                                                                                                                                                                                                         | 9469     |
| 78 | exp Tuberculosis/ or Tuberculos*.mp. or TB.mp. or koch*.mp.                                                                                                                                                                       | 283447   |
| 79 | (multiple adj (ill* or disease* or condition* or syndrom* or disorder*)).mp.                                                                                                                                                      | 5522     |
| 80 | ((Cooccur* or co-occur* or coexist* or co-exist* or multipl* or concord* or discord* or long-term or physical*) adj3 (disease* or ill* or care or condition* or disorder* or health* or medication* or symptom* or syndrom*)).mp. | 269814   |
| 81 | (comorbid* or multimorbid* or co-occurren* or co-morbid* or Multidisease* or multi-disease*).mp.                                                                                                                                  | 268450   |
| 82 | (comorbid* or multimorbid* or co-occurren* or co-morbid* or multi-morbid* or Multidisease* or multi-disease*).mp.                                                                                                                 | 268954   |
| 83 | exp Comorbidity/ or exp Multimorbidity/ or exp Multiple Chronic Conditions/                                                                                                                                                       | 111238   |
| 84 | 79 or 80 or 81 or 82 or 83                                                                                                                                                                                                        | 519584   |
| 85 | exp "Systematic Review"/                                                                                                                                                                                                          | 137409   |
| 86 | "systematic review*".m_titl.                                                                                                                                                                                                      | 134940   |
| 87 | exp Meta-Analysis/                                                                                                                                                                                                                | 121268   |
| 88 | "meta-analys*".m_titl.                                                                                                                                                                                                            | 115466   |
| 89 | exp "Systematic Review"/ or "systematic review*".m_titl. or exp Meta-Analysis/ or "meta-analys*".m_titl.                                                                                                                          | 260449   |
| 90 | 32 or 52 or 73                                                                                                                                                                                                                    | 13060984 |
| 91 | (32 or 52 or 73) and 78                                                                                                                                                                                                           | 228989   |
| 92 | (32 or 52 or 73) and 78 and 84                                                                                                                                                                                                    | 4072     |

|    |                                                |         |
|----|------------------------------------------------|---------|
| 93 | ((32 or 52 or 73) and 78 and 84 and 89)        | 89      |
| 94 | exp Animals/ not exp Humans/                   | 4747614 |
| 95 | ((32 or 52 or 73) and 78 and 84) not 94        | 4004    |
| 96 | ((32 or 52 or 73) and 78 and 84 and 89) not 94 | 89      |
| 97 | ((32 or 52 or 73) and 78 and 89) not 94        | 1701    |

Embase (October 23<sup>rd</sup> 2020)

| # ▲ | Searches                                                                                                                                                                                                                                                                                                               | Results |
|-----|------------------------------------------------------------------------------------------------------------------------------------------------------------------------------------------------------------------------------------------------------------------------------------------------------------------------|---------|
| 1   | exp non communicable disease/ or ((Non-communicable or Noncommunicable or Non-infectious) adj (disease* or condition* or illness*)).mp.                                                                                                                                                                                | 16547   |
| 2   | exp chronic disease/ or ((chronic or long-term) adj (disease* or condition* or illness*)).mp.                                                                                                                                                                                                                          | 268915  |
| 3   | exp heart disease/ or (heart adj (disease* or disorder* or failure)).mp. or (cardiac adj (disease* or disorder* or failure)).mp.                                                                                                                                                                                       | 1935434 |
| 4   | exp cardiovascular disease/ or (cardiovascular adj (disease* or disorder* or failure)).mp.                                                                                                                                                                                                                             | 4171750 |
| 5   | exp coronary artery disease/ or (coronary adj (disease* or disorder* or failure)).mp.                                                                                                                                                                                                                                  | 338836  |
| 6   | exp cerebrovascular disease/ or (cerebrovascular adj (disease* or disorder* or insufficienc* or occlusion*)).mp. or (vascular adj (disease* or disorder*)).mp. or (carotid* adj (disease* or disorder*)).mp.                                                                                                           | 760319  |
| 7   | exp peripheral occlusive artery disease/ or (arter* adj (disease* or disorder*)).mp.                                                                                                                                                                                                                                   | 427607  |
| 8   | exp rheumatic heart disease/ or exp congenital heart malformation/ or (heart adj3 (malform* or defect* or congeni*)).mp.                                                                                                                                                                                               | 187115  |
| 9   | exp vein thrombosis/ or ((deep vein or deep venous) adj thrombos*).mp. or phlebothrombos*.mp.                                                                                                                                                                                                                          | 137063  |
| 10  | exp lung embolism/ or (pulmonar* adj (thromboembolism* or embolism* or disease* or disorder*)).mp.                                                                                                                                                                                                                     | 205531  |
| 11  | exp cerebrovascular accident/ or stroke.mp.                                                                                                                                                                                                                                                                            | 513128  |
| 12  | exp neoplasm/ or Cancer*.mp. or neoplas*.mp. or tumor*.mp.                                                                                                                                                                                                                                                             | 5810559 |
| 13  | exp lung disease/ or exp respiratory tract disease/ or exp chronic obstructive lung disease/ or ((lung* or respiratory or pulmonar* or airflow or airway) adj2 (disease* or obstruct* or hypersensitiv*)).mp. or exp asthma/ or asthma*.mp. or exp chronic obstructive lung disease/ or exp respiratory tract allergy/ | 2529309 |
| 14  | exp diabetes mellitus/ or diabet*.mp.                                                                                                                                                                                                                                                                                  | 1165861 |
| 15  | exp autoimmune disease/ or ((autoimmun* or auto immun* or autoaggress* or auto aggress*) adj (disorder* or disease*)).mp.                                                                                                                                                                                              | 628015  |
| 16  | exp metabolic syndrome X/ or exp metabolic disorder/ or ((metabolic or insulin resistance) adj (disorder* or disease* or syndrome*)).mp.                                                                                                                                                                               | 2728282 |
| 17  | exp obesity/ or obes*.mp.                                                                                                                                                                                                                                                                                              | 632387  |
| 18  | exp osteoporosis/ or osteoporo*.mp. or bone loss.mp. or exp osteolysis/ or osteolysis.mp. or bone resorption.mp.                                                                                                                                                                                                       | 237604  |
| 19  | exp Parkinson disease/ or parkinson*.mp. or paralysis agitans.mp.                                                                                                                                                                                                                                                      | 212471  |

|    |                                                                                                                                                                                                                         |          |
|----|-------------------------------------------------------------------------------------------------------------------------------------------------------------------------------------------------------------------------|----------|
| 20 | exp arthritis/ or arthriti*.mp. or polyarthriti*.mp. or rheumarthriti*.mp.                                                                                                                                              | 510423   |
| 21 | exp kidney disease/ or (kidney adj (disease* or disorder*)).mp.                                                                                                                                                         | 973568   |
| 22 | exp liver disease/ or (liver adj (disease* or disorder* or dysfunction*)).mp.                                                                                                                                           | 1021173  |
| 23 | exp hypertension/ or high blood pressure*.mp. or hypertens*.mp.                                                                                                                                                         | 1010094  |
| 24 | exp hyperlipidemia/ or hyperlipem*.mp. or hyperlipidem*.mp. or lipem*.mp. or lipidem*.mp.                                                                                                                               | 170635   |
| 25 | exp hypercholesterolemia/ or ((high* or elevat*) adj cholesterol*).mp. or hypercholesterem*.mp. or hypercholesterolem*.mp.                                                                                              | 90843    |
| 26 | exp hypertriglyceridemia/ or hypertriglyceridem*.mp.                                                                                                                                                                    | 31673    |
| 27 | exp thyroid disease/ or (thyroid adj (disease* or disorder*)).mp. or exp hyperthyroidism/ or hyperthyroid*.mp. or exp hypothyroidism/ or hypothyroid*.mp. or ((thyroid-stimulating hormone* or tsh) adj deficient*).mp. | 238358   |
| 28 | exp motor neuron disease/ or motor neuron* disease*.mp. or lateral sclerosis*.mp. or motor system disease*.mp.                                                                                                          | 52581    |
| 29 | exp multiple sclerosis/ or multiple sclerosis.mp. or disseminated sclerosis.mp.                                                                                                                                         | 143653   |
| 30 | exp emphysema/ or emphysema*.mp.                                                                                                                                                                                        | 52663    |
| 31 | exp bronchitis/ or bronchit*.mp.                                                                                                                                                                                        | 70185    |
| 32 | 1 or 2 or 3 or 4 or 5 or 6 or 7 or 8 or 9 or 10 or 11 or 12 or 13 or 14 or 15 or 16 or 17 or 18 or 19 or 20 or 21 or 22 or 23 or 24 or 25 or 26 or 27 or 28 or 29 or 30 or 31                                           | 13930977 |
| 33 | exp mental disease/ or exp psychosis/ or ((mental* or psychiatr* or psycho*) adj (disorder* or disease* or illness*)).mp.                                                                                               | 2252075  |
| 34 | exp major depression/ or exp depression/ or Depress*.mp. or MDD.mp.                                                                                                                                                     | 837980   |
| 35 | exp anxiety disorder/ or exp anxiety/ or anxi*.mp.                                                                                                                                                                      | 518902   |
| 36 | exp phobia/ or phobi*.mp.                                                                                                                                                                                               | 35665    |
| 37 | exp schizophrenia/ or schizophreni*.mp. or hebephreni*.mp.                                                                                                                                                              | 209868   |
| 38 | exp somatoform disorder/ or ((somatoform* or somati* or medically unexplained or briquet or pain) adj (disorder* or syndrome* or symptom*)).mp. or exp medically unexplained symptom/                                   | 82640    |
| 39 | exp dissociative disorder/ or (dissociative adj (disorder* or hysteri* or reaction*)).mp. or dissociation*.mp.                                                                                                          | 142193   |
| 40 | exp hysteria/ or hysteri*.mp.                                                                                                                                                                                           | 7294     |
| 41 | exp mood disorder/ or ((affective* or mood*) adj (disorder* or disease* or illness* or symptom*)).mp.                                                                                                                   | 539796   |
| 42 | exp posttraumatic stress disorder/ or PTSD.mp. or ((post trauma* or posttrauma*) adj (stress* or neurose*)).mp. or combat disorder*.mp. or war disorder*.mp.                                                            | 68828    |

|    |                                                                                                                                                                                                                                |         |
|----|--------------------------------------------------------------------------------------------------------------------------------------------------------------------------------------------------------------------------------|---------|
| 43 | exp cognitive defect/ or ((cognitive or cognition or mental or neurocognitive) adj (dysfunction* or decline* or impairment* or deterioration* or disorder* or illness* or disease*)).mp.                                       | 802224  |
| 44 | exp personality disorder/ or personality disorder*.mp.                                                                                                                                                                         | 64830   |
| 45 | exp impulse control disorder/ or impulse control disorder*.mp. or intermittent explosive disorder*.mp.                                                                                                                         | 12514   |
| 46 | exp eating disorder/ or ((eating or appetite or feeding) adj disorder*).mp.                                                                                                                                                    | 64625   |
| 47 | exp bipolar disorder/ or ((bipolar or mani*) adj (disorder* or illness* or disease*)).mp.                                                                                                                                      | 73910   |
| 48 | exp obsessive compulsive disorder/ or OCD*.mp. or ((obsess*-compulsi* or obsess* or compulsi*) adj (disorder* or illness* or disease* or neuros*)).mp.                                                                         | 46156   |
| 49 | exp panic/ or (panic adj (attack* or disorder*)).mp.                                                                                                                                                                           | 25651   |
| 50 | exp agoraphobia/ or agoraphobi*.mp.                                                                                                                                                                                            | 7128    |
| 51 | exp neurosis/ or neuros*.mp. or neurotic disorder*.mp. or psychoneuros*.mp.                                                                                                                                                    | 284790  |
| 52 | 33 or 34 or 35 or 36 or 37 or 38 or 39 or 40 or 41 or 42 or 43 or 44 or 45 or 46 or 47 or 48 or 49 or 50 or 51                                                                                                                 | 3032495 |
| 53 | exp communicable disease/ or ((communic* or contag* or transmi* or infect*) adj (disease* or infection* or illness*)).mp.                                                                                                      | 227165  |
| 54 | exp bacterial infection/ or bacteri* infection*.mp.                                                                                                                                                                            | 875706  |
| 55 | exp conjunctivitis/ or conjunctivitis.mp.                                                                                                                                                                                      | 42120   |
| 56 | exp Human immunodeficiency virus/ or hiv.mp. or Human immuno deficiency virus.mp.                                                                                                                                              | 440016  |
| 57 | exp acquired immune deficiency syndrome/ or AIDS.mp. or immunodeficiency associated virus.mp. or immun* deficiency associated virus.mp. or acquired immunodeficiency syndrome*.mp. or acquired immun* deficiency syndrome*.mp. | 245085  |
| 58 | exp Buruli ulcer/ or Bairnsdale.mp. or Buruli.mp.                                                                                                                                                                              | 1384    |
| 59 | exp onchocerciasis/ or onchocer*.mp.                                                                                                                                                                                           | 7089    |
| 60 | hepatitis.mp. or exp hepatitis B/ or exp hepatitis C/                                                                                                                                                                          | 401827  |
| 61 | exp leishmaniasis/ or leishmania*.mp.                                                                                                                                                                                          | 45114   |
| 62 | exp leprosy/ or lepros*.mp. or hansen*.mp.                                                                                                                                                                                     | 32759   |
| 63 | exp elephantiasis/ or elephantias*.mp. or filaria*.mp.                                                                                                                                                                         | 17315   |
| 64 | exp trachoma/ or egyptian ophthalmia*.mp. or trachoma*.mp.                                                                                                                                                                     | 25318   |
| 65 | exp chikungunya/ or chickungunya.mp. or chikungunya.mp.                                                                                                                                                                        | 8172    |
| 66 | exp taeniasis/ or taenia*.mp.                                                                                                                                                                                                  | 13801   |
| 67 | exp Cysticercosis/ or cysticercos*.mp.                                                                                                                                                                                         | 5977    |



|    |                                                                                                                                                                                                                                   |          |
|----|-----------------------------------------------------------------------------------------------------------------------------------------------------------------------------------------------------------------------------------|----------|
| 68 | exp echinococcosis/ or hydatid*.mp. or echinococc*.mp.                                                                                                                                                                            | 30362    |
| 69 | exp Chagas disease/ or trypanosom*.mp. or chagas.mp.                                                                                                                                                                              | 47764    |
| 70 | exp trypanosomiasis/ or sleeping sickness.mp.                                                                                                                                                                                     | 25238    |
| 71 | exp Japanese encephalitis/ or (japanese adj3 encephalitis).mp.                                                                                                                                                                    | 7060     |
| 72 | exp syphilis/ or syphilis.mp.                                                                                                                                                                                                     | 32633    |
| 73 | 53 or 54 or 55 or 56 or 57 or 58 or 59 or 60 or 61 or 62 or 63 or 64 or 65 or 66 or 67 or 68 or 69 or 70 or 71 or 72                                                                                                              | 2039904  |
| 74 | exp tuberculosis/                                                                                                                                                                                                                 | 193084   |
| 75 | Tuberculos*.mp.                                                                                                                                                                                                                   | 245295   |
| 76 | TB.mp.                                                                                                                                                                                                                            | 72736    |
| 77 | koch*.mp.                                                                                                                                                                                                                         | 12432    |
| 78 | exp tuberculosis/ or Tuberculos*.mp. or TB.mp. or koch*.mp.                                                                                                                                                                       | 284028   |
| 79 | (multiple adj (ill* or disease* or condition* or syndrom* or disorder*)).mp.                                                                                                                                                      | 7515     |
| 80 | ((Cooccur* or co-occur* or coexist* or co-exist* or multipl* or concord* or discord* or long-term or physical*) adj3 (disease* or ill* or care or condition* or disorder* or health* or medication* or symptom* or syndrom*)).mp. | 468523   |
| 81 | (comorbid* or multimorbid* or co-occurren* or co-morbid* or Multidisease* or multi-disease*).mp.                                                                                                                                  | 461825   |
| 82 | (comorbid* or multimorbid* or co-occurren* or co-morbid* or multi-morbid* or Multidisease* or multi-disease*).mp.                                                                                                                 | 462635   |
| 83 | exp Comorbidity/ or exp Multimorbidity/ or exp Multiple Chronic Conditions/                                                                                                                                                       | 281021   |
| 84 | 79 or 80 or 81 or 82 or 83                                                                                                                                                                                                        | 895311   |
| 85 | exp "systematic review"/                                                                                                                                                                                                          | 268161   |
| 86 | "systematic review* ".m_titl.                                                                                                                                                                                                     | 163162   |
| 87 | exp meta analysis/                                                                                                                                                                                                                | 200254   |
| 88 | "meta-analys* ".m_titl.                                                                                                                                                                                                           | 144571   |
| 89 | exp "systematic review"/ or "systematic review* ".m_titl. or exp meta analysis/ or "meta-analys* ".m_titl.                                                                                                                        | 411674   |
| 90 | 32 or 52 or 73                                                                                                                                                                                                                    | 16955591 |
| 91 | (32 or 52 or 73) and 78                                                                                                                                                                                                           | 237676   |
| 92 | (32 or 52 or 73) and 78 and 84                                                                                                                                                                                                    | 9231     |
| 93 | (32 or 52 or 73) and 78 and 84 and 89                                                                                                                                                                                             | 271      |
| 94 | exp animal/ not exp human/                                                                                                                                                                                                        | 4710933  |

|    |                                                |      |
|----|------------------------------------------------|------|
| 95 | ((32 or 52 or 73) and 78 and 84) not 94        | 9130 |
| 96 | ((32 or 52 or 73) and 78 and 84 and 89) not 94 | 271  |
| 97 | ((32 or 52 or 73) and 78 and 89) not 94        | 3315 |

PsycINFO (October 23<sup>rd</sup> 2020)

| # ▲ | Searches                                                                                                                                                                                                                                             | Results |
|-----|------------------------------------------------------------------------------------------------------------------------------------------------------------------------------------------------------------------------------------------------------|---------|
| 1   | ((Non-communicable or Noncommunicable or Non-infectious) adj (disease* or condition* or illness*)).mp.                                                                                                                                               | 1054    |
| 2   | exp Chronic Illness/ or ((chronic or long-term) adj (disease* or condition* or illness*)).mp.                                                                                                                                                        | 48942   |
| 3   | exp Heart Disorders/ or (heart adj (disease* or disorder* or failure)).mp. or (cardiac adj (disease* or disorder* or failure)).mp.                                                                                                                   | 22461   |
| 4   | exp Cardiovascular Disorders/ or (cardiovascular adj (disease* or disorder* or failure)).mp.                                                                                                                                                         | 68973   |
| 5   | (coronary adj (disease* or disorder* or failure)).mp.                                                                                                                                                                                                | 450     |
| 6   | exp Cerebrovascular Disorders/ or (cerebrovascular adj (disease* or disorder* or insufficienc* or occlusion*)).mp. or (vascular adj (disease* or disorder*)).mp. or (carotid* adj (disease* or disorder*)).mp.                                       | 31536   |
| 7   | (arter* adj (disease* or disorder*)).mp.                                                                                                                                                                                                             | 2605    |
| 8   | (heart adj3 (malform* or defect* or congeni*)).mp.                                                                                                                                                                                                   | 1007    |
| 9   | exp Thromboses/ or ((deep vein or deep venous) adj thrombos*).mp. or phlebothrombos*.mp.                                                                                                                                                             | 1070    |
| 10  | exp Embolisms/ or (pulmonar* adj (thromboembolism* or embolism* or disease* or disorder*)).mp.                                                                                                                                                       | 3511    |
| 11  | exp Cerebrovascular Accidents/ or stroke.mp.                                                                                                                                                                                                         | 36761   |
| 12  | exp Neoplasms/ or Cancer*.mp. or neoplas*.mp. or tumor*.mp.                                                                                                                                                                                          | 83903   |
| 13  | exp Lung Disorders/ or exp Respiratory Tract Disorders/ or ((lung* or respiratory or pulmonar* or airflow or airway) adj2 (disease* or obstruct* or hypersensitiv*)).mp. or exp Asthma/ or asthma*.mp. or exp Chronic Obstructive Pulmonary Disease/ | 20498   |
| 14  | exp Diabetes Mellitus/ or diabet*.mp.                                                                                                                                                                                                                | 33566   |
| 15  | ((autoimmun* or auto immun* or autoaggress* or auto aggress*) adj (disorder* or disease*)).mp.                                                                                                                                                       | 2453    |
| 16  | exp Metabolic Syndrome/ or ((metabolic or insulin resistance) adj (disorder* or disease* or syndrome*)).mp.                                                                                                                                          | 5856    |

|    |                                                                                                                                                                                                                           |        |
|----|---------------------------------------------------------------------------------------------------------------------------------------------------------------------------------------------------------------------------|--------|
| 17 | exp Obesity/ or obes*.mp.                                                                                                                                                                                                 | 45201  |
| 18 | exp Osteoporosis/ or osteoporo*.mp. or bone loss.mp. or osteolysis.mp. or bone resorption.mp.                                                                                                                             | 2582   |
| 19 | exp Parkinson's Disease/ or parkinson*.mp. or paralysis agitans.mp.                                                                                                                                                       | 36257  |
| 20 | exp Arthritis/ or arthriti*.mp. or polyarthriti*.mp. or rheumarthriti*.mp.                                                                                                                                                | 7176   |
| 21 | exp Kidney Diseases/ or (kidney adj (disease* or disorder*)).mp.                                                                                                                                                          | 2912   |
| 22 | exp Liver Disorders/ or (liver adj (disease* or disorder* or dysfunction*)).mp.                                                                                                                                           | 5371   |
| 23 | exp Hypertension/ or high blood pressure*.mp. or hypertens*.mp.                                                                                                                                                           | 20357  |
| 24 | (hyperlipem* or hyperlipidem* or lipem* or lipidem*).mp.                                                                                                                                                                  | 1314   |
| 25 | ((high* or elevat*) adj cholesterol*) or hypercholesterem* or hypercholesterolem*).mp.                                                                                                                                    | 1637   |
| 26 | hypertriglyceridem*.mp.                                                                                                                                                                                                   | 293    |
| 27 | exp Thyroid Disorders/ or (thyroid adj (disease* or disorder*)).mp. or exp Hyperthyroidism/ or hyperthyroid*.mp. or exp Hypothyroidism/ or hypothyroid*.mp. or ((thyroid-stimulating hormone* or tsh) adj deficient*).mp. | 2924   |
| 28 | exp Nervous System Disorders/ or motor neuron* disease*.mp. or lateral scleros*.mp. or motor system disease*.mp.                                                                                                          | 319159 |
| 29 | exp Multiple Sclerosis/ or multiple sclerosis.mp. or disseminated sclerosis.mp.                                                                                                                                           | 16491  |
| 30 | exp Pulmonary Emphysema/ or emphysema*.mp.                                                                                                                                                                                | 285    |
| 31 | exp Bronchial Disorders/ or bronchit*.mp.                                                                                                                                                                                 | 476    |
| 32 | 1 or 2 or 3 or 4 or 5 or 6 or 7 or 8 or 9 or 10 or 11 or 12 or 13 or 14 or 15 or 16 or 17 or 18 or 19 or 20 or 21 or 22 or 23 or 24 or 25 or 26 or 27 or 28 or 29 or 30 or 31                                             | 567022 |
| 33 | exp Mental Disorders/ or exp Psychosis/ or ((mental* or psychiatr* or psycho*) adj (disorder* or disease* or illness*)).mp.                                                                                               | 921435 |
| 34 | exp Major Depression/ or exp "Depression (Emotion)"/ or Depress*.mp. or MDD.mp.                                                                                                                                           | 374034 |
| 35 | exp Anxiety Disorders/ or exp Anxiety/ or anxi*.mp.                                                                                                                                                                       | 273241 |

|    |                                                                                                                                                                                              |         |
|----|----------------------------------------------------------------------------------------------------------------------------------------------------------------------------------------------|---------|
| 36 | exp Phobias/ or phobi*.mp.                                                                                                                                                                   | 24242   |
| 37 | exp Schizophrenia/ or schizophreni*.mp. or hebephreni*.mp.                                                                                                                                   | 140371  |
| 38 | exp Somatoform Disorders/ or ((somatoform* or somati* or medically unexplained or briquet or pain) adj (disorder* or syndrome* or symptom*)).mp.                                             | 27313   |
| 39 | exp Dissociative Disorders/ or (dissociative adj (disorder* or hysteri* or reaction*)).mp. or dissociation*.mp.                                                                              | 24759   |
| 40 | exp Hysteria/ or hysteri*.mp.                                                                                                                                                                | 8253    |
| 41 | exp Affective Disorders/ or ((affective* or mood*) adj (disorder* or disease* or illness* or symptom*)).mp.                                                                                  | 170875  |
| 42 | exp Posttraumatic Stress Disorder/ or PTSD.mp. or ((post trauma* or posttrauma*) adj (stress* or neurose*)).mp. or combat disorder*.mp. or war disorder*.mp.                                 | 51508   |
| 43 | exp Cognitive Impairment/ or ((cognitive or cognition or mental or neurocognitive) adj (dysfunction* or decline* or impairment* or deterioration* or disorder* or illness* or disease*)).mp. | 221483  |
| 44 | exp Personality Disorders/ or personality disorder*.mp.                                                                                                                                      | 49598   |
| 45 | exp Impulse Control Disorders/ or impulse control disorder*.mp. or intermittent explosive disorder*.mp.                                                                                      | 2232    |
| 46 | exp Eating Disorders/ or ((eating or appetite or feeding) adj disorder*).mp.                                                                                                                 | 39055   |
| 47 | exp Bipolar Disorder/ or ((bipolar or mani*) adj (disorder* or illness* or disease*)).mp.                                                                                                    | 38332   |
| 48 | exp Obsessive Compulsive Disorder/ or OCD*.mp. or ((obsess*-compulsi* or obsess* or compulsi*) adj (disorder* or illness* or disease* or neuros*)).mp.                                       | 21451   |
| 49 | exp Panic Disorder/ or (panic adj (attack* or disorder*)).mp.                                                                                                                                | 13643   |
| 50 | exp Agoraphobia/ or agoraphobi*.mp.                                                                                                                                                          | 6095    |
| 51 | exp Neurosis/ or neuros*.mp. or neurotic disorder*.mp. or psychoneuros*.mp.                                                                                                                  | 81072   |
| 52 | 33 or 34 or 35 or 36 or 37 or 38 or 39 or 40 or 41 or 42 or 43 or 44 or 45 or 46 or 47 or 48 or 49 or 50 or 51                                                                               | 1284709 |

|    |                                                                                                                                                                                                 |       |
|----|-------------------------------------------------------------------------------------------------------------------------------------------------------------------------------------------------|-------|
| 53 | exp Infectious Disorders/ or ((communic* or contag* or transmi* or infect*) adj (disease* or infection* or illness*)).mp.                                                                       | 70725 |
| 54 | exp Bacterial Disorders/ or bacteri* infection*.mp.                                                                                                                                             | 2731  |
| 55 | exp Eye Disorders/ or conjunctivitis.mp.                                                                                                                                                        | 4950  |
| 56 | exp HIV/ or hiv.mp. or Human immuno deficiency virus.mp.                                                                                                                                        | 57416 |
| 57 | exp AIDS/ or AIDS.mp. or immunodeficiency associated virus.mp. or immun* deficiency associated virus.mp. or acquired immunodeficiency syndrome*.mp. or acquired immun* deficiency syndrome*.mp. | 48739 |
| 58 | (Bairnsdale or Buruli).mp.                                                                                                                                                                      | 7     |
| 59 | onchocer*.mp.                                                                                                                                                                                   | 47    |
| 60 | hepatitis.mp. or exp Hepatitis/                                                                                                                                                                 | 4736  |
| 61 | leishmania*.mp.                                                                                                                                                                                 | 61    |
| 62 | (lepros* or hansen*).mp.                                                                                                                                                                        | 1155  |
| 63 | (elephantias* or filaria*).mp.                                                                                                                                                                  | 75    |
| 64 | (egyptian ophthalmia* or trachoma*).mp.                                                                                                                                                         | 309   |
| 65 | (chickungunya or chikungunya).mp.                                                                                                                                                               | 39    |
| 66 | taenia*.mp.                                                                                                                                                                                     | 160   |
| 67 | cysticercos*.mp.                                                                                                                                                                                | 102   |
| 68 | (hydatid* or echinococc*).mp.                                                                                                                                                                   | 39    |
| 69 | (trypanosom* or chagas).mp.                                                                                                                                                                     | 217   |
| 70 | sleeping sickness.mp.                                                                                                                                                                           | 50    |
| 71 | (japanese adj3 encephalitis).mp.                                                                                                                                                                | 73    |
| 72 | exp Syphilis/ or syphilis.mp.                                                                                                                                                                   | 1870  |

|    |                                                                                                                                                                                                                                   |         |
|----|-----------------------------------------------------------------------------------------------------------------------------------------------------------------------------------------------------------------------------------|---------|
| 73 | 53 or 54 or 55 or 56 or 57 or 58 or 59 or 60 or 61 or 62 or 63 or 64 or 65 or 66 or 67 or 68 or 69 or 70 or 71 or 72                                                                                                              | 108493  |
| 74 | exp Tuberculosis/                                                                                                                                                                                                                 | 1223    |
| 75 | Tuberculos*.mp.                                                                                                                                                                                                                   | 2795    |
| 76 | TB.mp.                                                                                                                                                                                                                            | 1354    |
| 77 | koch*.mp.                                                                                                                                                                                                                         | 1045    |
| 78 | exp Tuberculosis/ or Tuberculos*.mp. or TB.mp. or koch*.mp.                                                                                                                                                                       | 4450    |
| 79 | (multiple adj (ill* or disease* or condition* or syndrom* or disorder*)).mp.                                                                                                                                                      | 913     |
| 80 | ((Cooccur* or co-occur* or coexist* or co-exist* or multipl* or concord* or discord* or long-term or physical*) adj3 (disease* or ill* or care or condition* or disorder* or health* or medication* or symptom* or syndrom*)).mp. | 116177  |
| 81 | (comorbid* or multimorbid* or co-occurren* or co-morbid* or multi-morbid* or Multidisease* or multi-disease*).mp.                                                                                                                 | 88147   |
| 82 | exp Comorbidity/                                                                                                                                                                                                                  | 33088   |
| 83 | 79 or 80 or 81 or 82                                                                                                                                                                                                              | 192590  |
| 84 | exp "Systematic Review"/                                                                                                                                                                                                          | 460     |
| 85 | "systematic review*".m_titl.                                                                                                                                                                                                      | 21652   |
| 86 | exp Meta Analysis/                                                                                                                                                                                                                | 4825    |
| 87 | "meta-analys*".m_titl.                                                                                                                                                                                                            | 18645   |
| 88 | exp "Systematic Review"/ or "systematic review*".m_titl. or exp Meta Analysis/ or "meta-analys*".m_titl.                                                                                                                          | 37279   |
| 89 | 32 or 52 or 73                                                                                                                                                                                                                    | 1665397 |
| 90 | (32 or 52 or 73) and 78                                                                                                                                                                                                           | 3046    |
| 91 | (32 or 52 or 73) and 78 and 83                                                                                                                                                                                                    | 362     |

|    |                                       |    |
|----|---------------------------------------|----|
| 92 | (32 or 52 or 73) and 78 and 83 and 88 | 6  |
| 93 | (32 or 52 or 73) and 78 and 88        | 27 |



Web of Science (October 23<sup>rd</sup> 2020)

- # [1,03](#) (#74 OR #52 OR #32 ) AND #82 AND #85  
9 [9](#) *Indexes=SCI-EXPANDED, SSCI, A&HCI, CPCI-S, CPCI-SSH, ESCI Timespan=All years*  
0
- # [62](#) (#74 OR #52 OR #32 ) AND #82 AND #78 AND #85  
8 *Indexes=SCI-EXPANDED, SSCI, A&HCI, CPCI-S, CPCI-SSH, ESCI Timespan=All years*  
9
- # [3,33](#) (#74 OR #52 OR #32 ) AND #82 AND #78  
8 [6](#) *Indexes=SCI-EXPANDED, SSCI, A&HCI, CPCI-S, CPCI-SSH, ESCI Timespan=All years*  
8
- # [87,8](#) (#74 OR #52 OR #32 ) AND #82  
8 [46](#) *Indexes=SCI-EXPANDED, SSCI, A&HCI, CPCI-S, CPCI-SSH, ESCI Timespan=All years*  
7
- # [11,0](#) #74 OR #52 OR #32  
8 [86,9](#) *Indexes=SCI-EXPANDED, SSCI, A&HCI, CPCI-S, CPCI-SSH, ESCI Timespan=All years*  
6 [31](#)
- # [226](#), #84 OR #83  
8 [528](#) *Indexes=SCI-EXPANDED, SSCI, A&HCI, CPCI-S, CPCI-SSH, ESCI Timespan=All years*  
5
- # [134](#), TI="Meta-analysis"  
8 [872](#) *Indexes=SCI-EXPANDED, SSCI, A&HCI, CPCI-S, CPCI-SSH, ESCI Timespan=All years*  
4
- # [147](#), TI = "Systematic Review"  
8 [319](#) *Indexes=SCI-EXPANDED, SSCI, A&HCI, CPCI-S, CPCI-SSH, ESCI Timespan=All years*  
3
- # [234](#), #81 OR #80 OR #79  
8 [479](#) *Indexes=SCI-EXPANDED, SSCI, A&HCI, CPCI-S, CPCI-SSH, ESCI Timespan=All years*  
2
- # [19,3](#) TS=koch\*  
8 [29](#) *Indexes=SCI-EXPANDED, SSCI, A&HCI, CPCI-S, CPCI-SSH, ESCI Timespan=All years*  
1
- # [80,7](#) TS=TB  
8 [79](#) *Indexes=SCI-EXPANDED, SSCI, A&HCI, CPCI-S, CPCI-SSH, ESCI Timespan=All years*  
0

- # [170](#). TS=Tuberculos\*  
7 [591](#) *Indexes=SCI-EXPANDED, SSCI, A&HCI, CPCI-S, CPCI-SSH, ESCI Timespan=All years*  
9
- # [659](#). #77 OR #76 OR #75  
7 [174](#) *Indexes=SCI-EXPANDED, SSCI, A&HCI, CPCI-S, CPCI-SSH, ESCI Timespan=All years*  
8
- # [238](#). TS=(comorbid\* or multimorbid\* or co-occurren\* or co-morbid\* or multi-  
7 [429](#) morbid\* or Multidisease\* or multi-disease\*)  
7 *Indexes=SCI-EXPANDED, SSCI, A&HCI, CPCI-S, CPCI-SSH, ESCI Timespan=All years*
- # [325](#). TS=((Cooccur\* or co-occur\* or coexist\* or co-  
7 [588](#) exist\* or multipl\* or concord\* or discord\* or long-  
6 term or physical\*) NEAR/3 (disease\* or ill\* or care or condition\* or disorder\* or health\* or  
medication\* or symptom\* or syndrom\*))  
*Indexes=SCI-EXPANDED, SSCI, A&HCI, CPCI-S, CPCI-SSH, ESCI Timespan=All years*
- # [191](#). TS=(multiple NEAR (ill\* or disease\* or condition\* or syndrom\* or disorder\*))  
7 [473](#) *Indexes=SCI-EXPANDED, SSCI, A&HCI, CPCI-S, CPCI-SSH, ESCI Timespan=All years*  
5
- # [2,67](#) #73 OR #72 OR #71 OR #70 OR #69 OR #68 OR #67 OR #66 OR #65 OR #64 OR #63 OR #6  
7 [7,95](#) 2 OR #61 OR #60 OR #59 OR #58 OR #57 OR #56 OR #55 OR #54 OR #53  
4 [6](#) *Indexes=SCI-EXPANDED, SSCI, A&HCI, CPCI-S, CPCI-SSH, ESCI Timespan=All years*
- # [23,3](#) TS=syphilis  
7 [89](#) *Indexes=SCI-EXPANDED, SSCI, A&HCI, CPCI-S, CPCI-SSH, ESCI Timespan=All years*  
3
- # [5,98](#) TS=(japanese NEAR/3 encephalitis)  
7 [1](#) *Indexes=SCI-EXPANDED, SSCI, A&HCI, CPCI-S, CPCI-SSH, ESCI Timespan=All years*  
2
- # [4,25](#) TS=sleeping sickness  
7 [7](#) *Indexes=SCI-EXPANDED, SSCI, A&HCI, CPCI-S, CPCI-SSH, ESCI Timespan=All years*  
1
- # [50,0](#) TS=trypanosom\* or TS=chagas  
7 [13](#) *Indexes=SCI-EXPANDED, SSCI, A&HCI, CPCI-S, CPCI-SSH, ESCI Timespan=All years*  
0
- # [19,7](#) TS=hydatid\* OR TS=echinococc\*  
6 [85](#) *Indexes=SCI-EXPANDED, SSCI, A&HCI, CPCI-S, CPCI-SSH, ESCI Timespan=All years*  
9

- # [4.65](#) TS=cysticercos\*  
6 [7](#) *Indexes=SCI-EXPANDED, SSCI, A&HCI, CPCI-S, CPCI-SSH, ESCI Timespan=All years*  
8
- # [8.25](#) TS=taenia\*  
6 [7](#) *Indexes=SCI-EXPANDED, SSCI, A&HCI, CPCI-S, CPCI-SSH, ESCI Timespan=All years*  
7
- # [6.62](#) TS=chickungunya Or TS=chikungunya  
6 [9](#) *Indexes=SCI-EXPANDED, SSCI, A&HCI, CPCI-S, CPCI-SSH, ESCI Timespan=All years*  
6
- # [19.9](#) TS=trachoma\*  
6 [87](#) *Indexes=SCI-EXPANDED, SSCI, A&HCI, CPCI-S, CPCI-SSH, ESCI Timespan=All years*  
5
- # [5](#) TS=egyptian ophthalmia\*  
6 *Indexes=SCI-EXPANDED, SSCI, A&HCI, CPCI-S, CPCI-SSH, ESCI Timespan=All years*  
4
- # [11.2](#) TS=elephantias\* OR TS=filaria\*  
6 [57](#) *Indexes=SCI-EXPANDED, SSCI, A&HCI, CPCI-S, CPCI-SSH, ESCI Timespan=All years*  
3
- # [30.1](#) TS=lepros\* OR TS=hansen\*  
6 [01](#) *Indexes=SCI-EXPANDED, SSCI, A&HCI, CPCI-S, CPCI-SSH, ESCI Timespan=All years*  
2
- # [41.8](#) TS=leishmania\*  
6 [00](#) *Indexes=SCI-EXPANDED, SSCI, A&HCI, CPCI-S, CPCI-SSH, ESCI Timespan=All years*  
1
- # [267.](#) TS=hepatitis  
6 [930](#) *Indexes=SCI-EXPANDED, SSCI, A&HCI, CPCI-S, CPCI-SSH, ESCI Timespan=All years*  
0
- # [6.45](#) TS=onchocer\*  
5 [3](#) *Indexes=SCI-EXPANDED, SSCI, A&HCI, CPCI-S, CPCI-SSH, ESCI Timespan=All years*  
9
- # [1.12](#) TS=Bairnsdale OR TS=Buruli  
5 [0](#) *Indexes=SCI-EXPANDED, SSCI, A&HCI, CPCI-S, CPCI-SSH, ESCI Timespan=All years*  
8
- # [640.](#) TS=AIDS OR TS=immunodeficiency associated virus OR TS=immun\* deficiency associated vi  
5 [388](#) rus OR TS=acquired immunodeficiency syndrome\* OR TS=acquired immun\* deficiency synd  
7 rome\*

*Indexes=SCI-EXPANDED, SSCI, A&HCI, CPCI-S, CPCI-SSH, ESCI Timespan=All years*

- # [374](#). TS=hiv OR TS=Human immuno deficiency virus  
5 [418](#) *Indexes=SCI-EXPANDED, SSCI, A&HCI, CPCI-S, CPCI-SSH, ESCI Timespan=All years*  
6
- # [10.5](#) TS=conjunctivitis  
5 [45](#) *Indexes=SCI-EXPANDED, SSCI, A&HCI, CPCI-S, CPCI-SSH, ESCI Timespan=All years*  
5
- # [240](#). TS=bacteri\* infection\*  
5 [625](#) *Indexes=SCI-EXPANDED, SSCI, A&HCI, CPCI-S, CPCI-SSH, ESCI Timespan=All years*  
4
- # [1.71](#) TS=((communic\* or contag\* or transmi\* or infect\*) NEAR (disease\* or infection\* or illness\* )  
5 [0.57](#) )  
3 [3](#) *Indexes=SCI-EXPANDED, SSCI, A&HCI, CPCI-S, CPCI-SSH, ESCI Timespan=All years*
- # [1.89](#) #51 OR #50 OR #49 OR #48 OR #47 OR #46 OR #45 OR #44 OR #43 OR #42 OR #41 OR #4  
5 [1.33](#) 0 OR #39 OR #38 OR #37 OR #36 OR #35 OR #34 OR #33  
2 [6](#) *Indexes=SCI-EXPANDED, SSCI, A&HCI, CPCI-S, CPCI-SSH, ESCI Timespan=All years*
- # [155](#). TS=neuros\* OR TS=neurotic disorder\* OR TS=psychoneuros\*  
5 [801](#) *Indexes=SCI-EXPANDED, SSCI, A&HCI, CPCI-S, CPCI-SSH, ESCI Timespan=All years*  
1
- # [5.16](#) TS=agoraphobi\*  
5 [5](#) *Indexes=SCI-EXPANDED, SSCI, A&HCI, CPCI-S, CPCI-SSH, ESCI Timespan=All years*  
0
- # [19.4](#) TS=(panic NEAR (attack\* or disorder\* ) )  
4 [59](#) *Indexes=SCI-EXPANDED, SSCI, A&HCI, CPCI-S, CPCI-SSH, ESCI Timespan=All years*  
9
- # [32.5](#) TS=OCD\* OR TS=((obsess\*-  
4 [51](#) compulsi\* or obsess\* or compulsi\*) NEAR (disorder\* or illness\* or disease\* or neuros\* ) )  
8 *Indexes=SCI-EXPANDED, SSCI, A&HCI, CPCI-S, CPCI-SSH, ESCI Timespan=All years*
- # [137](#). TS=((bipolar or mani\*) NEAR (disorder\* or illness\* or disease\* ) )  
4 [039](#) *Indexes=SCI-EXPANDED, SSCI, A&HCI, CPCI-S, CPCI-SSH, ESCI Timespan=All years*  
7
- # [35.5](#) TS=((eating or appetite or feeding) NEAR disorder\*)  
4 [73](#) *Indexes=SCI-EXPANDED, SSCI, A&HCI, CPCI-S, CPCI-SSH, ESCI Timespan=All years*  
6

- # [4.53](#) TS=impulse control disorder\* OR TS=intermittent explosive disorder\*  
4 [5](#) *Indexes=SCI-EXPANDED, SSCI, A&HCI, CPCI-S, CPCI-SSH, ESCI Timespan=All years*  
5
- # [52.3](#) TS=personality disorder\*  
4 [84](#) *Indexes=SCI-EXPANDED, SSCI, A&HCI, CPCI-S, CPCI-SSH, ESCI Timespan=All years*  
4
- # [325](#) TS=((cognitive or cognition or mental or neurocognitive) NEAR (dysfunction\* or decline\* or  
4 [105](#) impairment\* or deterioration\* or disorder\* or illness\* or disease\* )  
3 *Indexes=SCI-EXPANDED, SSCI, A&HCI, CPCI-S, CPCI-SSH, ESCI Timespan=All years*
- # [69.0](#) TS=PTSD OR TS=(((post NEAR trauma\*) or posttrauma\*) NEAR (stress\* or neurose\* ) OR T  
4 [02](#) S=combat disorder\* OR TS=war disorder\*  
2 *Indexes=SCI-EXPANDED, SSCI, A&HCI, CPCI-S, CPCI-SSH, ESCI Timespan=All years*
- # [73.2](#) TS=((affective\* or mood\*) NEAR (disorder\* or disease\* or illness\* or symptom\* ) )  
4 [80](#) *Indexes=SCI-EXPANDED, SSCI, A&HCI, CPCI-S, CPCI-SSH, ESCI Timespan=All years*  
1
- # [6.46](#) TS=hysteri\*  
4 [8](#) *Indexes=SCI-EXPANDED, SSCI, A&HCI, CPCI-S, CPCI-SSH, ESCI Timespan=All years*  
0
- # [215](#) TS=(dissociative NEAR (disorder\* or hysteri\* or reaction\* ) ) OR TS=dissociation\*  
3 [870](#) *Indexes=SCI-EXPANDED, SSCI, A&HCI, CPCI-S, CPCI-SSH, ESCI Timespan=All years*  
9
- # [122](#) TS=((somatoform\* or somati\* or (medically NEAR unexplained) or briquet or pain) NEAR (   
3 [031](#) disorder\* or syndrome\* or symptom\* ) )  
8 *Indexes=SCI-EXPANDED, SSCI, A&HCI, CPCI-S, CPCI-SSH, ESCI Timespan=All years*
- # [200](#) TS=schizophreni\* OR TS=hebephreni\*  
3 [099](#) *Indexes=SCI-EXPANDED, SSCI, A&HCI, CPCI-S, CPCI-SSH, ESCI Timespan=All years*  
7
- # [19.3](#) TS=phobi\*  
3 [59](#) *Indexes=SCI-EXPANDED, SSCI, A&HCI, CPCI-S, CPCI-SSH, ESCI Timespan=All years*  
6
- # [300](#) TS=anxi\*  
3 [816](#) *Indexes=SCI-EXPANDED, SSCI, A&HCI, CPCI-S, CPCI-SSH, ESCI Timespan=All years*  
5
- # [645](#) TS=Depress\* OR TS=MDD  
3 [434](#) *Indexes=SCI-EXPANDED, SSCI, A&HCI, CPCI-S, CPCI-SSH, ESCI Timespan=All years*  
4

- # [283](#). TS=((mental\* or psychiatr\* or psycho\*) NEAR (disorder\* or disease\* or illness\* )  
3 [212](#) *Indexes=SCI-EXPANDED, SSCI, A&HCI, CPCI-S, CPCI-SSH, ESCI Timespan=All years*  
3
- # [7.47](#) #31 OR #30 OR #29 OR #28 OR #27 OR #26 OR #25 OR #24 OR #23 OR #22 OR #21 OR #2  
3 [9.78](#) 0 OR #19 OR #18 OR #17 OR #16 OR #15 OR #14 OR #13 OR #12 OR #11 OR #10 OR #9 O  
2 [0](#) R #8 OR #7 OR #6 OR #5 OR #4 OR #3 OR #2 OR #1  
*Indexes=SCI-EXPANDED, SSCI, A&HCI, CPCI-S, CPCI-SSH, ESCI Timespan=All years*
- # [20.5](#) TS=bronchit\*  
3 [91](#) *Indexes=SCI-EXPANDED, SSCI, A&HCI, CPCI-S, CPCI-SSH, ESCI Timespan=All years*  
1
- # [26.7](#) TS=emphysema\*  
3 [27](#) *Indexes=SCI-EXPANDED, SSCI, A&HCI, CPCI-S, CPCI-SSH, ESCI Timespan=All years*  
0
- # [129](#). TS=multiple sclerosis OR TS=disseminated sclerosis  
2 [081](#) *Indexes=SCI-EXPANDED, SSCI, A&HCI, CPCI-S, CPCI-SSH, ESCI Timespan=All years*  
9
- # [67.9](#) TS=motor neuron\* disease\* OR TS=lateral scleros\* OR TS=motor system disease\*  
2 [22](#) *Indexes=SCI-EXPANDED, SSCI, A&HCI, CPCI-S, CPCI-SSH, ESCI Timespan=All years*  
8
- # [71.1](#) TS=(thyroid NEAR (disease\* or  
2 [05](#) disorder\* ) ) OR TS=hyperthyroid\* OR TS=hypothyroid\* OR TS=((thyroid-  
7 stimulating NEAR hormone\*) or tsh) NEAR deficien\*)  
*Indexes=SCI-EXPANDED, SSCI, A&HCI, CPCI-S, CPCI-SSH, ESCI Timespan=All years*
- # [14.1](#) TS=hypertriglyceridem\*  
2 [11](#) *Indexes=SCI-EXPANDED, SSCI, A&HCI, CPCI-S, CPCI-SSH, ESCI Timespan=All years*  
6
- # [113](#). TS=((high\* or elevat\*) NEAR cholesterol\*) Or TS=hypercholesterem\* OR TS=hypercholester  
2 [697](#) olem\*  
5 *Indexes=SCI-EXPANDED, SSCI, A&HCI, CPCI-S, CPCI-SSH, ESCI Timespan=All years*
- # [36.9](#) TS=hyperlipem\* OR TS=hyperlipidem\* or TS=lipem\* OR TS=lipidem\*  
2 [81](#) *Indexes=SCI-EXPANDED, SSCI, A&HCI, CPCI-S, CPCI-SSH, ESCI Timespan=All years*  
4
- # [613](#). TS=high blood pressure\* OR TS=hypertens\*  
2 [541](#) *Indexes=SCI-EXPANDED, SSCI, A&HCI, CPCI-S, CPCI-SSH, ESCI Timespan=All years*  
3

- # [161](#). TS=(liver NEAR (disease\* or disorder\* or dysfunction\* ) )  
2 [103](#) *Indexes=SCI-EXPANDED, SSCI, A&HCI, CPCI-S, CPCI-SSH, ESCI Timespan=All years*  
2
- # [125](#). TS=(kidney NEAR (disease\* or disorder\* ) )  
2 [492](#) *Indexes=SCI-EXPANDED, SSCI, A&HCI, CPCI-S, CPCI-SSH, ESCI Timespan=All years*  
1
- # [278](#). TS=arthriti\* OR TS=polyarthriti\* OR TS=rheumarthriti\*  
2 [897](#) *Indexes=SCI-EXPANDED, SSCI, A&HCI, CPCI-S, CPCI-SSH, ESCI Timespan=All years*  
0
- # [181](#). TS=parkinson\* OR TS=paralysis agitans  
1 [735](#) *Indexes=SCI-EXPANDED, SSCI, A&HCI, CPCI-S, CPCI-SSH, ESCI Timespan=All years*  
9
- # [195](#). TS=osteoporo\* OR TS=bone loss OR TS=osteolysis or TS=bone resorption  
1 [021](#) *Indexes=SCI-EXPANDED, SSCI, A&HCI, CPCI-S, CPCI-SSH, ESCI Timespan=All years*  
8
- # [426](#). TS=obes\*  
1 [882](#) *Indexes=SCI-EXPANDED, SSCI, A&HCI, CPCI-S, CPCI-SSH, ESCI Timespan=All years*  
7
- # [174](#). TS=((metabolic or (insulin near resistance) ) NEAR (disorder\* or disease\* or syndrome\* ) )  
1 [058](#) *Indexes=SCI-EXPANDED, SSCI, A&HCI, CPCI-S, CPCI-SSH, ESCI Timespan=All years*  
6
- # [109](#). TS=((autoimmun\* or (auto NEAR immun\*) or autoaggress\* or (auto NEAR  
1 [133](#) aggress\* ) NEAR (disorder\* or disease\* ) )  
5 *Indexes=SCI-EXPANDED, SSCI, A&HCI, CPCI-S, CPCI-SSH, ESCI Timespan=All years*
- # [771](#). TS=diabet\*  
1 [913](#) *Indexes=SCI-EXPANDED, SSCI, A&HCI, CPCI-S, CPCI-SSH, ESCI Timespan=All years*  
4
- # [385](#). TS=((lung\* or respiratory or pulmonar\* or airflow or airway) NEAR/2 (disease\* or  
1 [258](#) obstruct\* or hypersensitiv\* ) ) OR TS=asthma\*  
3 *Indexes=SCI-EXPANDED, SSCI, A&HCI, CPCI-S, CPCI-SSH, ESCI Timespan=All years*
- # [3.52](#) TS=Cancer\* or TS=neoplas\* OR TS=tumor\*  
1 [0.63](#) *Indexes=SCI-EXPANDED, SSCI, A&HCI, CPCI-S, CPCI-SSH, ESCI Timespan=All years*  
2 [1](#)
- # [356](#). TS=stroke  
1 [775](#) *Indexes=SCI-EXPANDED, SSCI, A&HCI, CPCI-S, CPCI-SSH, ESCI Timespan=All years*  
1

- # [164](#). TS=(pulmonar\* NEAR (thromboembolism\* or embolism\* or disease\* or disorder\* ) )  
1 [438](#)  
0 *Indexes=SCI-EXPANDED, SSCI, A&HCI, CPCI-S, CPCI-SSH, ESCI Timespan=All years*
- # [34.7](#) TS=(("deep vein" or "deep venous") NEAR thrombos\*) OR TS=phlebothrombos\*  
9 [25](#)  
*Indexes=SCI-EXPANDED, SSCI, A&HCI, CPCI-S, CPCI-SSH, ESCI Timespan=All years*
- # [52.9](#) TS=(heart NEAR/3 (malform\* or defect\* or congeni\* ) )  
8 [10](#)  
*Indexes=SCI-EXPANDED, SSCI, A&HCI, CPCI-S, CPCI-SSH, ESCI Timespan=All years*
- # [223](#). TS=(arter\* NEAR (disease\* or disorder\* ) )  
7 [717](#)  
*Indexes=SCI-EXPANDED, SSCI, A&HCI, CPCI-S, CPCI-SSH, ESCI Timespan=All years*
- # [131](#). TS=(cerebrovascular NEAR (disease\* or disorder\* or insufficienc\* or  
6 [935](#) occlusion\* ) ) OR TS=(vascular NEAR (disease\* or  
disorder\* ) ) OR TS=(carotid\* NEAR (disease\* or disorder\* ) )  
*Indexes=SCI-EXPANDED, SSCI, A&HCI, CPCI-S, CPCI-SSH, ESCI Timespan=All years*
- # [260](#). TS=(coronary NEAR (disease\* or disorder\* or failure ) )  
5 [403](#)  
*Indexes=SCI-EXPANDED, SSCI, A&HCI, CPCI-S, CPCI-SSH, ESCI Timespan=All years*
- # [286](#). TS=(cardiovascular NEAR (disease\* or disorder\* or failure ) )  
4 [220](#)  
*Indexes=SCI-EXPANDED, SSCI, A&HCI, CPCI-S, CPCI-SSH, ESCI Timespan=All years*
- # [561](#). TS=(heart NEAR (disease\* or disorder\* or failure ) ) OR TS=(cardiac NEAR (disease\* or  
3 [756](#) disorder\* or failure ) )  
*Indexes=SCI-EXPANDED, SSCI, A&HCI, CPCI-S, CPCI-SSH, ESCI Timespan=All years*
- # [500](#). TS=((chronic or long-term) NEAR (disease\* or condition\* or illness\* ) )  
2 [606](#)  
*Indexes=SCI-EXPANDED, SSCI, A&HCI, CPCI-S, CPCI-SSH, ESCI Timespan=All years*
- # [12.4](#) TS=((Non-communicable or Noncommunicable or Non-infectious) NEAR/1 (disease\* or  
1 [03](#) condition\* or illness\* ) )  
*Indexes=SCI-EXPANDED, SSCI, A&HCI, CPCI-S, CPCI-SSH, ESCI Timespan=All years*



Global Index Medicus (October 23<sup>rd</sup> 2020)

(((("Noncommunicable Diseases" OR (((("Non-communicable" or Noncommunicable or "Non-infectious") AND (disease\* or condition\* or illness\*)))) OR ("Chronic Disease" OR (((chronic or "long-term") AND (disease\* or condition\* or illness\*)))) OR ("Heart Diseases" OR ((heart AND (disease\* or disorder\* or failure) or (cardiac AND (disease\* or disorder\* or failure)))) OR ("Cardiovascular Diseases" OR ((cardiovascular AND (disease\* or disorder\* or failure)))) OR ("Coronary Disease" OR (coronary AND (disease\* or disorder\* or failure))) OR ("Cerebrovascular Disorders" OR ((cerebrovascular AND (disease\* or disorder\* or insufficienc\* or occlusion\*) or (vascular AND (disease\* or disorder\*)) or (carotid\* AND (disease\* or disorder\*)))) OR ("Peripheral Arterial Disease" OR (arter\* AND (disease\* or disorder\*))) OR ("Rheumatic Heart Disease" OR "Heart Defects, Congenital" OR ((heart AND (malform\* or defect\* or congeni\*))) OR ("Venous Thrombosis" OR ((("deep vein" or "deep venous") AND thrombos\*) or phlebothrombos\*)) OR ("Pulmonary Embolism" OR ((pulmonar\* AND (thromboembolism\* or embolism\* or disease\* or disorder\*))) OR ("Stroke" OR (stroke)) OR ("Neoplasms" OR (Cancer\* or neoplas\* or tumor\*)) OR ("Lung Diseases" OR "Respiratory Tract Diseases" OR "Lung Diseases, Obstructive" OR (((lung\* or respiratory or pulmonar\* or airflow or airway) AND (disease\* or obstruct\* or hypersensitiv\*))) OR "Asthma" OR asthma\* OR "Pulmonary Disease, Chronic Obstructive" OR "Respiratory Hypersensitivity") OR ("Diabetes Mellitus" or diabet\*) OR ("Autoimmune Diseases" OR ((autoimmun\* or (auto AND immun\*) or autoaggress\* or (auto AND aggress\*)) AND (disorder\* or disease\*)) OR ("Metabolic Syndrome" OR "Metabolic Diseases" OR (((metabolic or "insulin resistance") AND (disorder\* or disease\* or syndrome\*))) OR ("Obesity" OR obes\*) OR ("Osteoporosis" OR (osteoporo\* or "bone loss" or "Osteolysis" or osteolysis or "bone resorption")) OR ("Parkinson Disease" OR (parkinson\* or "paralysis agitans")) OR ("Arthritis" OR (arthrit\* or polyarthrit\* or rheumarthrit\*)) OR ("Kidney Diseases" OR ((kidney AND (disease\* or disorder\*))) OR ("Liver Diseases" OR (liver AND (disease\* or disorder\* or dysfunction\*))) OR ("Hypertension" OR ("high blood pressure" or hypertens\*)) OR ("Hyperlipidemias" OR (hyperlipem\* or hyperlipidem\* or lipem\* or lipidem\*)) OR ("Hypercholesterolemia" OR (((high\* or elevat\*) AND cholesterol\*) or hypercholesterem\* or hypercholesterolem\*)) OR ("Hypertriglyceridemia" OR (hypertriglyceridem\*)) OR ("Thyroid Diseases" OR (thyroid AND (disease\* or disorder\*)) OR "Hyperthyroidism" OR (hyperthyroid\*) OR "Hypothyroidism" OR (hypothyroid\*) OR ( ("thyroid-stimulating hormone" or tsh) AND deficien\*)) OR ("Motor Neuron Disease" OR ("motor neuron disease") OR (lateral AND scleros\*) OR ("motor system disease")) OR ("Multiple Sclerosis" OR ("multiple sclerosis" or "disseminated sclerosis")) OR ("Emphysema" OR emphysema\*) OR ("Bronchitis" OR bronchit\*)) OR ("Mental Disorders" OR "Psychotic Disorders" OR ((mental\* or psychiatr\* or psycho\*) AND (disorder\* or disease\* or illness\*))) OR ("Depressive Disorder, Major" OR "Depression" OR (Depress\* or MDD)) OR ("Anxiety Disorders" OR "Anxiety" OR anxi\*) OR ("Phobic Disorders" OR phobi\*) OR ("Schizophrenia" OR (schizophreni\* or hebephreni\*)) OR ("Somatoform Disorders" OR "Medically Unexplained Symptoms" OR ((somatoform\* or somati\* or (medically AND unexplained) or briquet or pain) AND (disorder\* or syndrome\* or symptom\*))) OR ("Dissociative Disorders" OR (dissociative AND (disorder\* or hysteri\* or reaction\*)) or dissociation\*) OR ("Hysteria" or hysteri\*) OR ("Mood Disorders" OR ((affective\* or mood\*) AND (disorder\* or disease\* or illness\* or symptom\*))) OR ("Stress Disorders, Post-Traumatic" OR (PTSD or ((posttrauma\* or trauma\*) AND (stress\* or neurose\*)) or "combat disorder" or "war disorder")) OR ("Cognition Disorders" OR ((cognitive or cognition or mental or neurocognitive) AND (dysfunction\* or decline\* or impairment\* or deterioration\* or disorder\* or illness\* or disease\*))) OR ("Personality Disorders" OR "personality disorder") OR ("Disruptive, Impulse Control, and Conduct Disorders" OR ("impulse control disorder" or "intermittent explosive disorder")) OR ("Feeding and Eating Disorders" OR ((eating or appetite or feeding) AND disorder\*)) OR ("Bipolar Disorder" OR ((bipolar or mani\*) AND (disorder\* or illness\* or disease\*)) OR ("Obsessive-Compulsive Disorder" OR OCD\* or ((obsess\* or compulsi\*) AND (disorder\* or illness\* or disease\*

or neuros\*)) OR ("Panic Disorder" OR ((panic AND (attack\* or disorder\*))) OR ("Agoraphobia" OR agoraphobi\*) OR ("Neurotic Disorders" OR (neuros\* or "neurotic disorder" or psychoneuros\*)) OR (("Communicable Diseases" OR (((communic\* or contag\* or transmi\* or infect\*) AND (disease\* or infection\* or illness\*)))) OR ("Bacterial Infections" OR ( bacteri\* infection\*)) OR ("Conjunctivitis") OR ("HIV" OR "Human immuno deficiency virus") OR ("Acquired Immunodeficiency Syndrome" OR (AIDS or "immunodeficiency associated virus" or (immun\* deficiency associated virus) or (acquired immunodeficiency syndrome\*) or (acquired immun\* deficiency syndrome\*))) OR ("Buruli Ulcer" OR ( Bairnsdale or Buruli)) OR ("Onchocerciasis" OR (onchocer\*)) OR ("Hepatitis B" OR "Hepatitis C" OR (hepatitis)) OR ("Leishmaniasis" OR (leishmania\*)) OR ("Leprosy" OR (lepros\* or hansen\*)) OR ("Elephantiasis, Filarial" OR (elephantias\* or filaria\*)) OR ("Trachoma" OR ((egyptian ophthalmia\*) or trachoma\*)) OR ("Chikungunya Fever" OR (chikungunya or chikungunya)) OR ("Taeniasis" OR taenia\*) OR ("Cysticercosis" OR cysticercos\*) OR ("Echinococcosis" OR (hydatid or echinococc\*)) OR ("Chagas Disease" OR (trypanosom\* or chagas)) OR ("Trypanosomiasis" OR ("sleeping sickness")) OR ("Encephalitis, Japanese" OR (japanese encephalitis)) OR ("Syphilis")) AND ("Tuberculosis" OR Tuberculos\* OR TB OR koch\*) AND ("Systematic Review" OR (systematic AND review\*) OR "Meta-Analysis" OR meta-analys\*)

131

### OpenGrey (23/10/2020)

(((((("Noncommunicable Diseases" OR (((("Non-communicable" or Noncommunicable or "Non-infectious") AND (disease\* or condition\* or illness\*)))) OR ("Chronic Disease" OR (((chronic or "long-term") AND (disease\* or condition\* or illness\*)))) OR ("Heart Diseases" OR ((heart AND (disease\* or disorder\* or failure)) or (cardiac AND (disease\* or disorder\* or failure)))) OR ("Cardiovascular Diseases" OR ((cardiovascular AND (disease\* or disorder\* or failure)))) OR ("Coronary Disease" OR (coronary AND (disease\* or disorder\* or failure))) OR ("Cerebrovascular Disorders" OR ((cerebrovascular AND (disease\* or disorder\* or insufficienc\* or occlusion\*)) or (vascular AND (disease\* or disorder\*)) or (carotid\* AND (disease\* or disorder\*)))) OR ("Peripheral Arterial Disease" OR ( arter\* AND (disease\* or disorder\*))) OR ("Rheumatic Heart Disease" OR "Heart Defects, Congenital" OR ((heart AND (malform\* or defect\* or congeni\*))) OR ("Venous Thrombosis" OR ( ("deep vein" or "deep venous") AND thrombos\*) or phlebothrombos\*)) OR ("Pulmonary Embolism" OR ((pulmonar\* AND (thromboembolism\* or embolism\* or disease\* or disorder\*))) OR ("Stroke" OR (stroke)) OR ("Neoplasms" OR (Cancer\* or neoplas\* or tumor\*)) OR ("Lung Diseases" OR "Respiratory Tract Diseases" OR "Lung Diseases, Obstructive" OR (((lung\* or respiratory or pulmonar\* or airflow or airway) AND (disease\* or obstruct\* or hypersensitiv\*))) OR "Asthma" OR asthma\* OR "Pulmonary Disease, Chronic Obstructive" OR "Respiratory Hypersensitivity") OR ("Diabetes Mellitus" or diabet\*) OR ("Autoimmune Diseases" OR ((autoimmun\* or (auto AND immun\*) or autoaggress\* or (auto AND aggress\*)) AND (disorder\* or disease\*)) OR ("Metabolic Syndrome" OR "Metabolic Diseases" OR (((metabolic or "insulin resistance") AND (disorder\* or disease\* or syndrome\*)))) OR ("Obesity" OR obes\*) OR ("Osteoporosis" OR (osteoporo\* or "bone loss" or "Osteolysis" or osteolysis or "bone resorption")) OR ("Parkinson Disease" OR (parkinson\* or "paralysis agitans")) OR ("Arthritis" OR (arthriti\* or polyarthriti\* or rheumarthriti\*)) OR ("Kidney Diseases" OR ((kidney AND (disease\* or disorder\*))) OR ("Liver Diseases" OR (liver AND (disease\* or disorder\* or dysfunction\*))) OR ("Hypertension" OR ("high blood pressure" or hypertens\*)) OR ("Hyperlipidemias" OR (hyperlipem\* or hyperlipidem\* or lipem\* or lipidem\*)) OR ("Hypercholesterolemia" OR (((high\* or elevat\*) AND cholesterol\*) or hypercholesterem\* or hypercholesterolem\*)) OR ("Hypertriglyceridemia" OR (hypertriglyceridem\*)) OR ("Thyroid Diseases" OR (thyroid AND (disease\* or disorder\*)) OR

"Hyperthyroidism " OR (hyperthyroid\*) OR "Hypothyroidism" OR (hypothyroid\*) OR ( ("thyroid-stimulating hormone" or tsh) AND deficien\*)) OR ("Motor Neuron Disease" OR ("motor neuron disease") OR (lateral AND scleros\*) OR ("motor system disease")) OR ("Multiple Sclerosis" OR ("multiple sclerosis" or "disseminated sclerosis")) OR ("Emphysema" OR emphysema\*) OR ("Bronchitis" OR bronchit\*) OR (("Mental Disorders" OR "Psychotic Disorders" OR ((mental\* or psychiatr\* or psycho\*) AND (disorder\* or disease\* or illness\*))) OR ("Depressive Disorder, Major" OR "Depression" OR (Depress\* or MDD)) OR ("Anxiety Disorders" OR "Anxiety" OR anx\*) OR ("Phobic Disorders" OR phobi\*) OR ("Schizophrenia" Or (schizophreni\* or hebephreni\*)) OR ("Somatoform Disorders" OR "Medically Unexplained Symptoms" OR ( (somatoform\* or somati\* or (medically AND unexplained) or briquet or pain) AND (disorder\* or syndrom\* or symptom\*))) OR ("Dissociative Disorders" OR (dissociative AND (disorder\* or hysteri\* or reaction\*) or dissociation\*) OR ("Hysteria" or hysteri\*) OR ("Mood Disorders" OR ((affective\* or mood\*) AND (disorder\* or disease\* or illness\* or symptom\*))) OR ("Stress Disorders, Post-Traumatic" OR (PTSD or ((posttrauma\* or trauma\*) AND (stress\* or neurose\*)) or "combat disorder" or "war disorder")) OR ("Cognition Disorders" OR ( ((cognitive or cognition or mental or neurocognitive) AND (dysfunction\* or decline\* or impairment\* or deterioration\* or disorder\* or illness\* or disease\*))) OR ("Personality Disorders" OR "personality disorder") OR ("Disruptive, Impulse Control, and Conduct Disorders" OR ("impulse control disorder" or "intermittent explosive disorder")) OR ("Feeding and Eating Disorders" OR ((eating or appetite or feeding) AND disorder\*)) OR ("Bipolar Disorder" OR ((bipolar or mani\*) AND (disorder\* or illness\* or disease\*)) OR ("Obsessive-Compulsive Disorder" OR OCD\* or ((obsess\* or compulsi\*) AND (disorder\* or illness\* or disease\* or neuros\*)) OR ("Panic Disorder" OR ((panic AND (attack\* or disorder\*))) OR ("Agoraphobia" OR agoraphobi\*) OR ("Neurotic Disorders" OR (neuros\* or "neurotic disorder" or psychoneuros\*)) OR ("Communicable Diseases" OR (((communic\* or contag\* or transmi\* or infect\*) AND (disease\* or infection\* or illness\*))) OR ("Bacterial Infections" OR ( bacteri\* infection\*)) OR ("Conjunctivitis") OR ("HIV" OR "Human immuno deficiency virus") OR ("Acquired Immunodeficiency Syndrome" OR (AIDS or "immunodeficiency associated virus" or (immun\* deficiency associated virus) or (acquired immunodeficiency syndrome\*) or (acquired immun\* deficiency syndrome\*)) OR ("Buruli Ulcer" OR ( Bairnsdale or Buruli)) OR ("Onchocerciasis" OR (onchocer\*)) OR ("Hepatitis B" OR "Hepatitis C" OR (hepatitis)) OR ("Leishmaniasis" OR (leishmania\*)) OR ("Leprosy" OR (lepros\* or hansen\*)) OR ("Elephantiasis, Filarial" OR (elephantias\* or filaria\*)) OR ("Trachoma" OR ((egyptian ophthalmia\*) or trachoma\*)) OR ("Chikungunya Fever" OR (chikungunya or chikungunya)) OR ("Taeniasis" OR taenia\*) OR ("Cysticercosis" OR cysticercos\*) OR ("Echinococcosis" OR (hydatid or echinococc\*)) OR ("Chagas Disease" OR (trypanosom\* or chagas)) OR ("Trypanosomiasis" OR ("sleeping sickness")) OR ("Encephalitis, Japanese" OR (japanese encephalitis)) OR ("Syphilis")) AND ("Tuberculosis" OR Tuberculos\* OR TB OR koch\*) AND ("Systematic Review" OR (systematic AND review\*) OR "Meta-Analysis" OR meta-analys\*)

## PROSPERO (07/10/2020)

((((Non-communicable or Noncommunicable or Non-infectious) AnD (disease\* or condition\* or illness\*))) oR ((MeSH DESCRIPTOR Chronic Disease EXPLODE ALL TREES) or ((chronic or long-term) AnD (disease\* or condition\* or illness\*))) oR ((MeSH DESCRIPTOR Heart Diseases EXPLODE ALL TREES) or ((heart AnD (disease\* or disorder\* or failure)) or (cardiac AnD (disease\* or disorder\* or failure)))) oR ((MeSH DESCRIPTOR Cardiovascular Diseases EXPLODE ALL TREES) OR ((cardiovascular AnD (disease\* or disorder\* or failure)))) oR ((MeSH DESCRIPTOR Coronary Disease EXPLODE ALL TREES) OR ((coronary AnD (disease\* or disorder\* or failure)))) oR ((MeSH DESCRIPTOR Cerebrovascular Disorders EXPLODE ALL TREES) OR ((cerebrovascular AnD (disease\* or disorder\* or insufficienc\* or occlusion\*)) OR (vascular AnD (disease\* or disorder\*)) OR ((carotid\* AnD (disease\* or disorder\*)))) oR ((MeSH DESCRIPTOR Peripheral Arterial Disease EXPLODE ALL TREES) OR ((arter\* AnD (disease\* or disorder\*))) oR ((MeSH DESCRIPTOR Rheumatic Heart Disease EXPLODE ALL TREES) OR (MeSH DESCRIPTOR Heart Defects, Congenital EXPLODE ALL TREES) or ((heart AnD (malform\* or defect\* or congeni\*))) oR ((MeSH DESCRIPTOR Venous Thrombosis EXPLODE ALL TREES) OR (((deep vein or deep venous) AnD thrombos\*)) OR (phlebothrombos\*)) oR ((MeSH DESCRIPTOR Pulmonary Embolism EXPLODE ALL TREES) OR ((pulmonar\* AnD (thromboembolism\* or embolism\* or disease\* or disorder\*))) oR ((MeSH DESCRIPTOR Stroke EXPLODE ALL TREES) OR (stroke)) oR ((MeSH DESCRIPTOR Neoplasms EXPLODE ALL TREES) OR (Cancer\*) OR (neoplas\*) OR (tumor\*)) oR ((MeSH DESCRIPTOR Lung Diseases EXPLODE ALL TREES) OR (MeSH DESCRIPTOR Respiratory Tract Diseases EXPLODE ALL TREES) OR (MeSH DESCRIPTOR Lung Diseases, Obstructive EXPLODE ALL TREES) OR (((lung\* or respiratory or pulmonar\* or airflow or airway) AnD (disease\* or obstruct\* or hypersensitiv\*))) OR (MeSH DESCRIPTOR Asthma EXPLODE ALL TREES) Or (asthma\*) OR (MeSH DESCRIPTOR Pulmonary Disease, Chronic Obstructive EXPLODE ALL TREES) OR (MeSH DESCRIPTOR Respiratory Hypersensitivity EXPLODE ALL TREES)) oR ((MeSH DESCRIPTOR Diabetes Mellitus EXPLODE ALL TREES) OR (diabet\*)) oR ((MeSH DESCRIPTOR Autoimmune Diseases EXPLODE ALL TREES) OR (((autoimmun\* or auto immun\* or autoaggress\* or auto aggress\*) AnD (disorder\* or disease\*))) oR ((MeSH DESCRIPTOR Metabolic Syndrome X EXPLODE ALL TREES) OR (MeSH DESCRIPTOR Metabolic Diseases EXPLODE ALL TREES) OR (((metabolic or insulin resistance) AnD (disorder\* or disease\* or syndrome\*))) oR ((MeSH DESCRIPTOR Obesity EXPLODE ALL TREES) OR (obes\*)) oR ((MeSH DESCRIPTOR Osteoporosis EXPLODE ALL TREES) OR (osteoporo\* or bone loss) OR (MeSH DESCRIPTOR Osteolysis EXPLODE ALL TREES) OR (osteolysis or "bone resorption")) oR ((MeSH DESCRIPTOR Parkinson Disease EXPLODE ALL TREES) OR (parkinson\* or "paralysis agitans")) oR ((MeSH DESCRIPTOR Arthritis EXPLODE ALL TREES) OR (arthriti\* or polyarthriti\* or rheumarthriti\*)) oR ((MeSH DESCRIPTOR Kidney Diseases EXPLODE ALL TREES) OR ((kidney AnD (disease\* or disorder\*))) oR ((MeSH DESCRIPTOR Liver Diseases EXPLODE ALL TREES) OR ((liver AnD (disease\* or disorder\* or dysfunction\*))) oR ((MeSH DESCRIPTOR Hypertension EXPLODE ALL TREES) OR (high blood pressure\* or hypertens\*)) oR ((MeSH DESCRIPTOR Hyperlipidemias EXPLODE ALL TREES) OR (hyperlipem\* or hyperlipidem\* or lipem\* or lipidem\*)) oR ((MeSH DESCRIPTOR Hypercholesterolemia EXPLODE ALL TREES) OR (((high\* or elevat\* AnD cholesterol\*)) OR (hypercholesterem\* or hypercholesterolem\*)) oR ((MeSH DESCRIPTOR Hypertriglyceridemia EXPLODE ALL TREES) OR (hypertriglyceridem\*)) oR ((MeSH DESCRIPTOR Thyroid Diseases EXPLODE ALL TREES) OR ((thyroid AnD (disease\* or disorder\*))) OR (MeSH DESCRIPTOR Hyperthyroidism EXPLODE ALL TREES) OR (hypothyroid\*) OR ( (thyroid-stimulating hormone\* or tsh) AnD deficien\*)) oR ((MeSH DESCRIPTOR Motor Neuron Disease EXPLODE ALL TREES) OR (motor neuron\* disease\*) Or (lateral scleros\*) OR (motor system disease\*)) oR ((MeSH DESCRIPTOR Multiple Sclerosis EXPLODE ALL TREES) OR ("multiple sclerosis" or

"disseminated sclerosis") oR ((MeSH DESCRIPTOR Emphysema EXPLODE ALL TREES) OR (emphysema\*)) oR ((MeSH DESCRIPTOR Bronchitis EXPLODE ALL TREES) OR (bronchit\*)) ) OR (((MeSH DESCRIPTOR Mental Disorders EXPLODE ALL TREES) OR (MeSH DESCRIPTOR Psychotic Disorders EXPLODE ALL TREES) OR (((mental\* or psychiatr\* or psycho\*) AnD (disorder\* or disease\* or illness\*))) oR ((MeSH DESCRIPTOR Depressive Disorder, Major EXPLODE ALL TREES) OR (MeSH DESCRIPTOR Depression EXPLODE ALL TREES) OR (Depress\* or MDD)) oR ((MeSH DESCRIPTOR Anxiety Disorders EXPLODE ALL TREES) oR (MeSH DESCRIPTOR Anxiety EXPLODE ALL TREES) OR (anxi\*)) oR ((MeSH DESCRIPTOR Phobic Disorders EXPLODE ALL TREES) OR ( phobi\*)) oR ((MeSH DESCRIPTOR Schizophrenia EXPLODE ALL TREES) OR (schizophreni\* or hebephreni\*)) oR ((MeSH DESCRIPTOR Somatoform Disorders EXPLODE ALL TREES) OR (((somatoform\* or somati\* or "medically unexplained" or briquet or pain) AnD (disorder\* or syndrome\* or symptom\*)) or (MeSH DESCRIPTOR Medically Unexplained Symptoms EXPLODE ALL TREES)) oR ((MeSH DESCRIPTOR Dissociative Disorders EXPLODE ALL TREES) OR ((dissociative AnD (disorder\* or hysteri\* or reaction\*)) OR (dissociation\*)) oR ((MeSH DESCRIPTOR Hysteria EXPLODE ALL TREES) OR (hysteri\*)) oR ((MeSH DESCRIPTOR Mood Disorders EXPLODE ALL TREES) OR (((affective\* or mood\*) AnD (disorder\* or disease\* or illness\* or symptom\*))) oR ((MeSH DESCRIPTOR Stress Disorders, Post-Traumatic EXPLODE ALL TREES) or (PTSD) OR (((post trauma\* or posttrauma\*) AnD (stress\* or neurose\*)) or ("combat disorder") OR ("war disorder")) oR ((MeSH DESCRIPTOR Cognition Disorders EXPLODE ALL TREES) OR (((cognitive or cognition or mental or neurocognitive) AnD (dysfunction\* or decline\* or impairment\* or deterioration\* or disorder\* or illness\* or disease\*))) oR ((MeSH DESCRIPTOR Personality Disorders EXPLODE ALL TREES) OR ("personality disorder") OR ("personality disorders")) oR ((impulse control disorder\*) OR (intermittent explosive disorder\*)) oR ((MeSH DESCRIPTOR Feeding and Eating Disorders EXPLODE ALL TREES) OR (((eating or appetite or feeding) AnD disorder\*)) oR ((MeSH DESCRIPTOR Bipolar Disorder EXPLODE ALL TREES) OR (((bipolar or mani\*) AnD (disorder\* or illness\* or disease\*))) oR ((MeSH DESCRIPTOR Obsessive-Compulsive Disorder EXPLODE ALL TREES) OR (OCD\*) OR ((obsess\*-compulsi\* or obsess\* or compuls\*) AnD (disorder\* or illness\* or disease\* or neuros\*))) oR ((MeSH DESCRIPTOR Panic Disorder EXPLODE ALL TREES) OR ((panic AnD (attack\* or disorder\*))) oR ((MeSH DESCRIPTOR Agoraphobia EXPLODE ALL TREES) OR (agoraphobi\*)) oR ((MeSH DESCRIPTOR Neurotic Disorders EXPLODE ALL TREES) OR (neuros\* or "neurotic disorder" or psychoneuros\*)) OR (((MeSH DESCRIPTOR Communicable Diseases EXPLODE ALL TREES) OR ((communic\* or contag\* or transmi\* or infect\*) AnD (disease\* or infection\* or illness\*))) oR ((MeSH DESCRIPTOR Bacterial Infections EXPLODE ALL TREES) OR (bacteri\* infection\*)) oR ((MeSH DESCRIPTOR Conjunctivitis EXPLODE ALL TREES) OR (conjunctivitis)) oR ((MeSH DESCRIPTOR HIV EXPLODE ALL TREES) OR (hiv or "Human immuno deficiency virus")) oR ((MeSH DESCRIPTOR Acquired Immunodeficiency Syndrome EXPLODE ALL TREES) OR (AIDS) OR ("immunodeficiency associated virus") OR (immun\* AND "deficiency associated virus") OR ("acquired immunodeficiency syndrome")) oR ((MeSH DESCRIPTOR Buruli Ulcer EXPLODE ALL TREES) OR (Bairnsdale or Buruli)) oR ((MeSH DESCRIPTOR Onchocerciasis EXPLODE ALL TREES) OR (onchocer\*)) oR ((MeSH DESCRIPTOR Hepatitis B EXPLODE ALL TREES) OR (MeSH DESCRIPTOR Hepatitis C EXPLODE ALL TREES) OR (hepatitis)) oR ((MeSH DESCRIPTOR Leishmaniasis EXPLODE ALL TREES) OR (leishmania\*)) oR ((MeSH DESCRIPTOR Leprosy EXPLODE ALL TREES) OR (lepros\* or hansen\*)) oR ((MeSH DESCRIPTOR Elephantiasis, Filarial EXPLODE ALL TREES) OR (elephantias\* or filaria\*)) oR ((MeSH DESCRIPTOR Trachoma EXPLODE ALL TREES) OR ("egyptian ophthalmia" or trachoma\*)) oR ((MeSH DESCRIPTOR Chikungunya Fever EXPLODE ALL TREES) OR (chikungunya or chikungunya)) oR ((MeSH DESCRIPTOR Taeniasis EXPLODE ALL TREES) OR taenia\*) oR ((MeSH DESCRIPTOR Cysticercosis EXPLODE ALL TREES) OR (cysticercos\*)) oR ((MeSH DESCRIPTOR Echinococcosis EXPLODE ALL TREES)

OR (hydatid\* or echinococc\*) oR ((MeSH DESCRIPTOR Chagas Disease EXPLODE ALL TREES) OR (trypanosom\* or chagas)) oR ((MeSH DESCRIPTOR Trypanosomiasis EXPLODE ALL TREES) OR ("sleeping sickness")) oR ((MeSH DESCRIPTOR Encephalitis, Japanese EXPLODE ALL TREES) OR (japanese AnD encephalitis)) oR ((MeSH DESCRIPTOR Syphilis EXPLODE ALL TREES) OR (syphilis))) AND ((MeSH DESCRIPTOR Tuberculosis EXPLODE ALL TREES) OR (Tuberculos\*) OR (TB) OR (koch\*))

1341
